# Supplementary material
Source: PubMed Central journal article supplement (PMC3340215)
Supplement: supp_M111.288670_jbc.M111.288670-1.pdf [file supp_M111.288670_jbc.M111.288670-1.pdf]

# Supplemental Figure S1

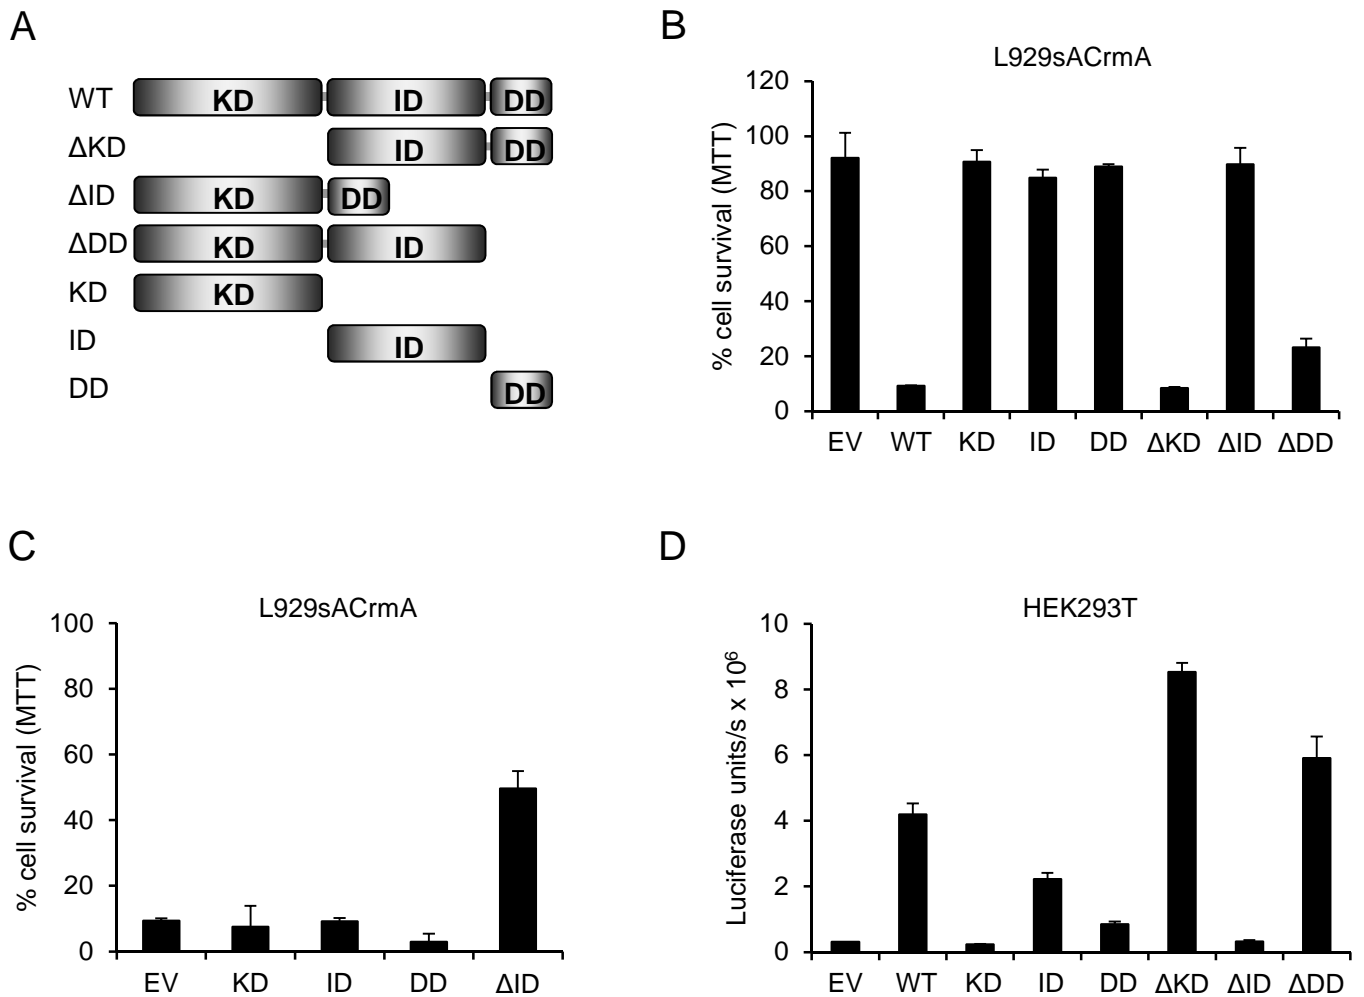

**FIGURE S1 Structure-function analysis of RIPK1 in TNF signaling.** **A.** Domain organization of RIPK1 and overview of the analyzed RIPK1 mutants. **B, C.** Wild-type mRIPK1 (WT) and mRIPK1 mutants were introduced in L929sACrmA cells by retroviral transduction. Cell survival was measured by MTT assay 36 h after the transduction (**B**) or cells were stimulated with hTNF (10000 IU/ml) for 16h before determination of cell survival by MTT. **D.** WT mRIPK1 and RIPK1 mutants were overexpressed in HEK293T cells together with the NF- $\kappa$ B reporter plasmid pNF-conLuc and the  $\beta$ -galactosidase expression vector pUT651. Lysates were made 24 h after transfection and luciferase activity was measured.
