# Supplementary material
Source: PubMed Central journal article supplement (PMC3340215)
Supplement: supp_M111.288670_jbc.M111.288670-2.pdf [file supp_M111.288670_jbc.M111.288670-2.pdf]

## Supplemental Figure S2

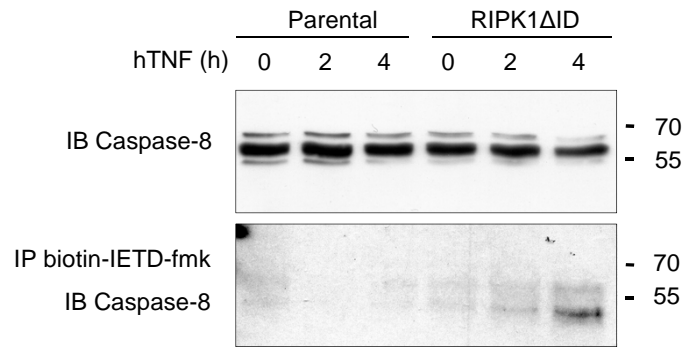

**FIGURE S2 L929sA cells expressing RIPK1 $\Delta$ ID show a time-dependent increase of caspase-8 cleavage fragments upon hTNF stimulation.** Parental and RIPK1 $\Delta$ ID-expressing L929sA cells were stimulated with hTNF (10000 IU/ml) and lysates were made at the indicated time points. Active caspase-8 was immunoprecipitated using biotin-IETD-fmk and revealed with a caspase-8 specific antibody.
