# Supplementary material
Source: PubMed Central journal article supplement (PMC3340215)
Supplement: supp_M111.288670_jbc.M111.288670-3.pdf [file supp_M111.288670_jbc.M111.288670-3.pdf]

# Supplemental Figure S3

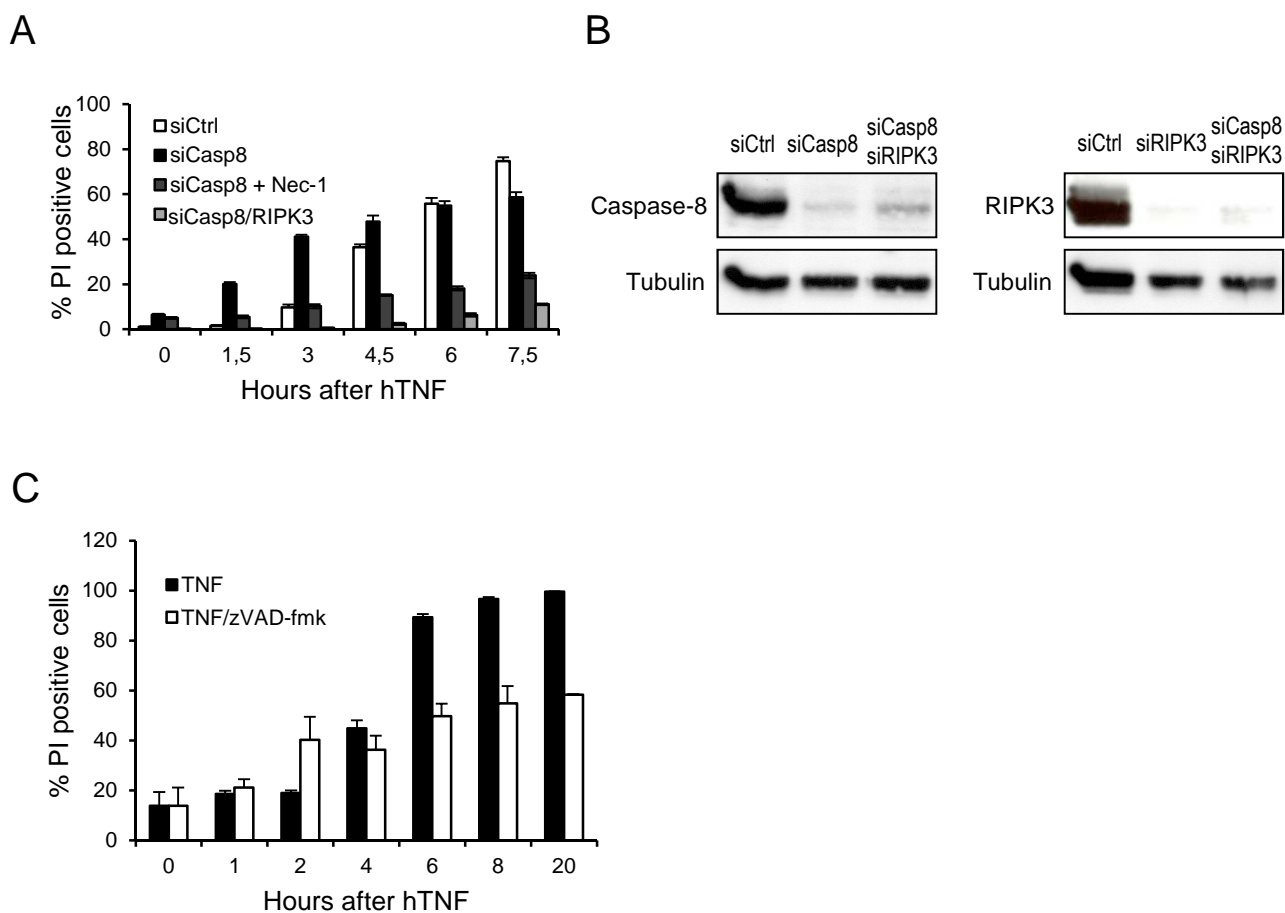

**FIGURE S3 Shift to necroptosis upon inhibition of caspase activation depends on RIPK3 and endogenous RIPK1.** **A.** L929sA cells expressing RIPK1 $\Delta$ ID were transfected with siRNAs targeting caspase-8 and RIPK3 before stimulation with hTNF (10000 IU/ml). Cell death (% PI-positive cells) was measured using a BDPathway™ 855 instrument at the indicated time points. **B.** Western blot showing efficiencies of caspase-8 and RIPK3 knockdown. **C.** RIPK1-depleted cells were reconstituted with RIPK1 $\Delta$ ID and stimulated with hTNF (10000 IU/ml) in the absence or presence of zVAD-fmk (20  $\mu$ M).
